# Supplementary material
Source: PubMed Central journal article supplement (PMC2676868)
Supplement: NIHMS88075-supplement-s1.pdf [file NIHMS88075-supplement-s1.pdf]

# Latency and selectivity of single neurons indicate hierarchical processing in the human medial temporal lobe

## Supplementary Information

Florian Mormann, Simon Kornblith, Rodrigo Quian Quiroga, Alexander Kraskov, Moran Cerf, Itzhak Fried, Christof Koch

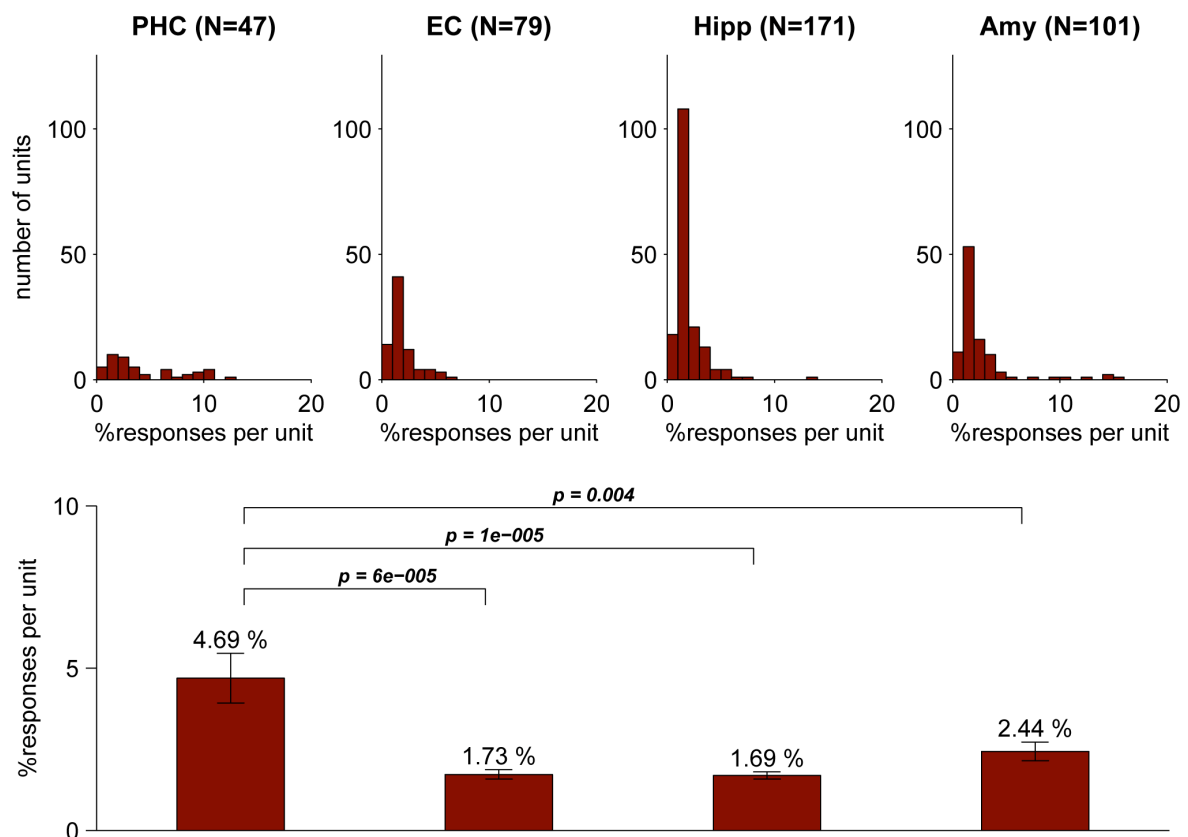

**Supplementary Figure S1.** *Upper panel:* Histograms of the relative number (percentage) of responses per unit for neurons in the four MTL regions. *Lower panel:* Comparison of regional selectivity as reflected by the mean percentage of responses per unit (two-sided Mann-Whitney U test, only p-values <0.05 are shown).

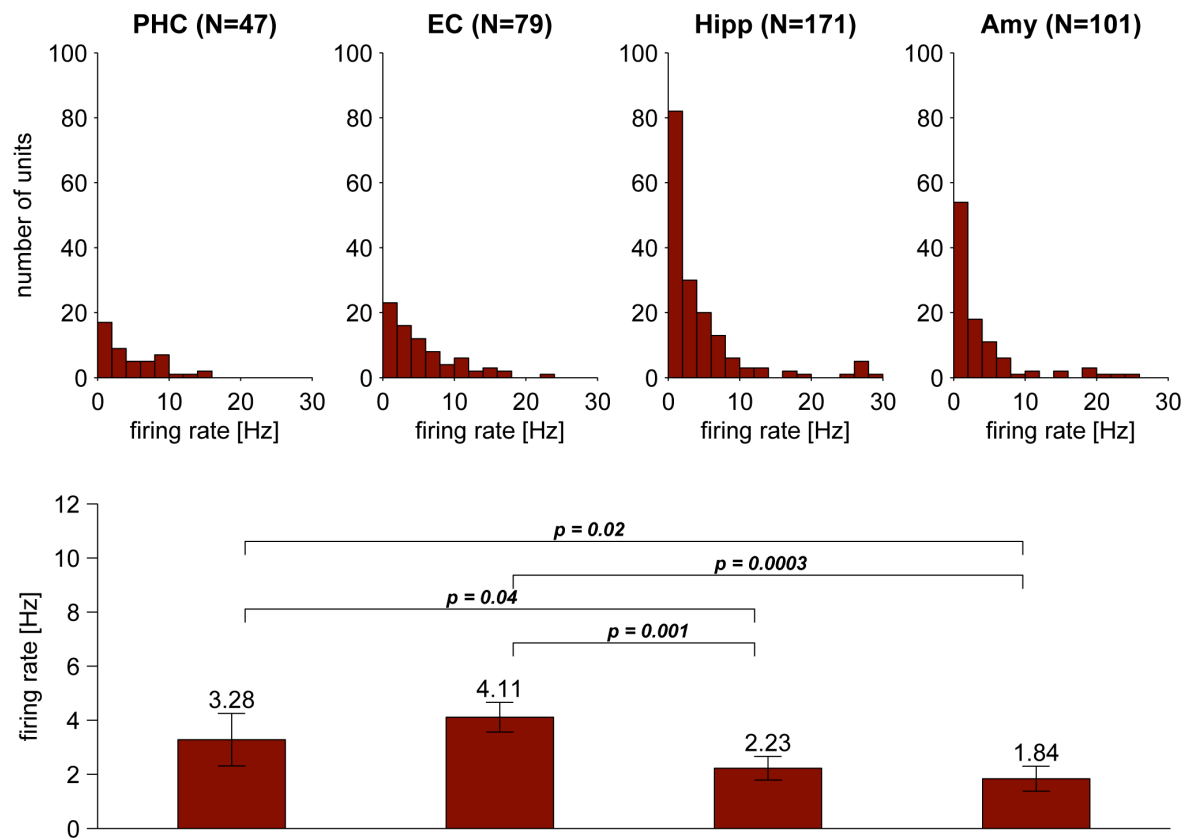

**Supplementary Figure S2.** *Upper panel:* Histograms of the baseline firing rates of responsive neurons in the four MTL regions. *Lower panel:* Comparison of regional baseline activity (two-sided Mann-Whitney U test, only p-values <0.05 are shown).
